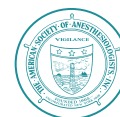

# ANESTHESIOLOGY

The Journal of the American Society of Anesthesiologists, Inc. • [anesthesiology.org](http://anesthesiology.org)

Mission: Promoting scientific discovery and knowledge in perioperative, critical care, and pain medicine to advance patient care.

## EDITOR-IN-CHIEF

James C. Eisenach, M.D.  
Editor-in-Chief, ANESTHESIOLOGY  
Department of Anesthesiology  
Wake Forest University School of Medicine  
Medical Center Boulevard  
Winston-Salem, NC 27157  
Tel: (319) 356-4601  
1-800-260-5631  
E-mail: [editorial-office@anesthesiology.org](mailto:editorial-office@anesthesiology.org)

## PAST EDITORS-IN-CHIEF, ANESTHESIOLOGY

Henry S. Ruth, M.D., 1940–1955  
Ralph M. Tovell, M.D., 1956–1958  
James E. Eckenhoff, M.D., 1959–1962  
Leroy D. Vandam, M.D., 1963–1970  
Arthur S. Keats, M.D., 1971–1973  
Nicholas M. Greene, M.D., 1974–1976  
C. Philip Larson, Jr., M.D., 1977–1979  
John D. Michenfelder, M.D., 1980–1985  
Lawrence J. Saidman, M.D., 1986–1996  
Michael M. Todd, M.D., 1997–2006

ANESTHESIOLOGY (ISSN 0003-3022) is published monthly by Lippincott Williams & Wilkins, 16522 Hunters Green Parkway, Hagerstown, MD 21740-2116. Business office: Two Commerce Square, 2001 Market Street, Philadelphia, PA 19103. Periodicals postage paid at Hagerstown, MD, and at additional mailing offices. Copyright © 2012, the American Society of Anesthesiologists, Inc.

**Annual Subscription Rates:** *United States*—\$719 Individual, \$1309 Institution, \$289 In-training. *Rest of World*—\$759 Individual, \$1454 Institution, \$289 In-training. Single copy rate \$126. Subscriptions outside of North America must add \$52 for airfreight delivery. Add state sales tax, where applicable. The GST tax of 7% must be added to all orders shipped to Canada (Lippincott Williams & Wilkins' GST Identification #895524239, Publications Mail Agreement #1119672). Indicate in-training status and name of institution. Institution rates apply to libraries, hospitals, corporations, and partnerships of three or more individuals. Subscription prices outside the United States must be prepaid. Prices subject to change without notice. Subscriptions will begin with currently available issue unless otherwise requested. Visit us online at [www.lww.com](http://www.lww.com).

Individual and in-training subscription rates include print and access to the online version. Online-only subscriptions for individuals (\$245) and persons in training (\$245) are available to nonmembers and may be ordered by downloading a copy of the Online Subscription FAXback Form from the Web site, completing the information requested, and faxing the completed form to 301-223-2400/+44 (0) 20 7981 0535. Institutional rates are for print only; online subscriptions are available via Ovid. Institutions can choose to purchase a print and online subscription together for a discounted rate. Institutions that wish to purchase a print subscription, please contact Lippincott Williams & Wilkins, 16522 Hunters Green Parkway, Hagerstown, MD 21740-2116; phone: 1-800-638-3030 (outside the United States 301-223-2300/+44 (0) 20 7981 0525); fax: 301-223-2400/+44 (0) 20 7981 0535. Institutions that wish to purchase an online subscription or online with print, please contact the Ovid Regional Sales Office near you or visit [www.ovid.com/site/index.jsp](http://www.ovid.com/site/index.jsp) and select Contact and Locations.

## ASA OFFICERS

John M. Zerwas, M.D., President  
Jane C. K. Fitch, M.D., President-Elect  
Jerry A. Cohen, M.D., Immediate Past President  
John P. Abenstein, M.D., First Vice-President  
Arnold J. Berry, M.D., M.P.H., Vice-President for Scientific Affairs

## COVER ART

James P. Rathmell, M.D.  
Boston, Massachusetts

Annemarie B. Johnson, C.M.I.  
Medical Illustrator  
Winston-Salem, North Carolina

## CME EDITORS

Leslie C. Jameson, M.D.  
Dan J. Kopacz, M.D.

## LWW PUBLICATION STAFF

Druanne Martin, Publisher  
Joseph Albrecht, Journal Production Editor  
Debbie Moody, Journal Production Associate  
Michelle Smith, Senior Account Manager, Advertising  
Keida Spurlock, Classified Advertising Representative

**Address for non-member subscription information, orders, or change of address:** Lippincott Williams & Wilkins, 16522 Hunters Green Parkway, Hagerstown, MD 21740-2116; phone: 1-800-638-3030 (outside the United States 301-223-2300/+44 (0) 20 7981 0525); fax: 301-223-2400/+44 (0) 20 7981 0535; email: [customerservice@lww.com](mailto:customerservice@lww.com). In Japan, contact LWW Japan Ltd., 3-23-14 Hongo, Bunkyo-ku, Tokyo 113, Japan; phone: 81-3-5689-5400; fax: 81-3-5689-5402; email: [bclaim@lwwis.co.jp](mailto:bclaim@lwwis.co.jp). In Bangladesh, India, Nepal, Pakistan, and Sri Lanka, contact Globe Publications Pvt. Ltd., B-13 3rd Floor, A Block, Shopping Complex, Naraina, Vihar, Ring Road, New Delhi 110028, India; phone: 91-11-25770411; fax: 91-11-25778876; email: [info@globe.pub.com](mailto:info@globe.pub.com).

**Address for member subscription information, orders, or change of address:** Members of the American Society of Anesthesiologists receive the print and online journal with their membership. To become a member or provide a change of address, please contact the American Society of Anesthesiologists, 520 N. Northwest Highway, Park Ridge, IL 60068-2573; phone: 847-825-5586; fax: 847-825-1692; email: [membership@ASAhq.org](mailto:membership@ASAhq.org). For all other membership inquiries, contact Lippincott Williams & Wilkins Customer Service Department, P.O. Box 1580, Hagerstown, MD 21741-1580; phone: 1-800-638-3030 (outside the United States 301-223-2300/+44 (0) 20 7981 0525); fax: 301-223-2400/+44 (0) 20 7981 0535; email: [memberservice@lww.com](mailto:memberservice@lww.com).

**Postmaster:** Send address changes to ANESTHESIOLOGY, P.O. Box 1550, Hagerstown, MD 21740.

**Advertising:** Please contact Michelle Smith, Senior Account Manager, Advertising, Lippincott Williams & Wilkins, 333 Seventh Avenue, 19th Floor, New York, NY 10001; tel: (646) 674-6537, fax: (646) 607-5479, e-mail: [Michelle.Smith@wolterskluwer.com](mailto:Michelle.Smith@wolterskluwer.com). For classified advertising: Keida Spurlock, Recruitment Advertising Representative, Lippincott Williams & Wilkins, Two Commerce Square, 2001 Market Street, Philadelphia, PA 19103; tel: (215) 521-8501, fax: (215) 689-2453. e-mail: [Keida.Spurlock@wolterskluwer.com](mailto:Keida.Spurlock@wolterskluwer.com).



# ANESTHESIOLOGY

The Journal of the American Society of Anesthesiologists, Inc. • [anesthesiology.org](http://anesthesiology.org)

Mission: Promoting scientific discovery and knowledge in perioperative, critical care, and pain medicine to advance patient care.

## EDITOR-IN-CHIEF

James C. Eisenach, M.D.  
Winston-Salem, North Carolina

## SENIOR EDITORS

Michael J. Avram, Ph.D., Chicago, Illinois  
Hugh C. Hemmings, Jr., M.D., Ph.D., New York, New York  
J. Lance Lichtor, M.D., New Haven, Connecticut  
Bruno Riou, M.D., Ph.D., Paris, France  
David S. Warner, M.D., Durham, North Carolina

## STATISTICAL EDITOR

Timothy T. Houle, Ph.D.  
Winston-Salem, North Carolina

## WEB EDITOR

J. Lance Lichtor, M.D.  
New Haven, Connecticut

## EDITORS

J. David Clark, M.D., Ph.D., Palo Alto, California  
Charles D. Collard, M.D., Houston, Texas  
Shiroh Isono, M.D., Chiba, Japan  
Judy R. Kersten, M.D., Milwaukee, Wisconsin  
Jean Mantz, M.D., Ph.D., Clichy, France  
Daniel I. Sessler, M.D., Cleveland, Ohio  
Jeanine P. Wiener-Kronish, M.D., Boston, Massachusetts  
William L. Young, M.D., San Francisco, California

## ASSOCIATE EDITORS

Julien Amour, M.D., Ph.D., Paris, France  
Takashi Asai, M.D., Ph.D., Osaka, Japan  
George S. Bause, M.D., M.P.H., Cleveland, Ohio  
Beatrice Beck-Schimmer, M.D., Zurich, Switzerland  
John Butterworth, M.D., Richmond, Virginia  
Jaume Canet, M.D., Ph.D., Barcelona, Spain  
Carol Wiley Cassella, M.D., Seattle, Washington  
Frances Chung, M.D., Toronto, Canada  
Albert Dahan, M.D., Ph.D., Leiden, The Netherlands  
Andrew J. Davidson, M.D., M.B.B.S., F.A.N.Z.C.A.,  
Melbourne, Australia

ANESTHESIOLOGY is abstracted or indexed in Index Medicus/MEDLINE, Science Citation Index/SciSearch, Current Contents/Clinical Medicine, Current Contents/Life Sciences, Reference Update, EMBASE/Excerpta Medica, Biological Abstracts (BIOSIS), Chemical Abstracts, Hospital Literature Index, and Comprehensive Index to Nursing and Allied Health Literature (CINAHL).

Stefan G. De Hert, M.D., Ph.D., Ghent, Belgium  
Matthias Eikermann, M.D., Ph.D., Boston, Massachusetts  
Pamela Flood, M.D., New York, New York  
Amanda A. Fox, M.D., M.P.H., Boston, Massachusetts  
Admir Hadzic, M.D., Ph.D., New York, New York  
Quinn H. Hogan, M.D., Milwaukee, Wisconsin  
Franz Kehl, M.D., Ph.D., D.E.A.A., Karlsruhe, Germany  
Sachin Kheterpal, M.D., M.B.A., Ann Arbor, Michigan  
Yannick Le Manach, M.D., Paris, France  
Jerrold H. Levy, M.D., F.A.H.A., Atlanta, Georgia  
J. Lance Lichtor, M.D., New Haven, Connecticut  
Ronald S. Litman, D.O., F.A.A.P., Philadelphia, Pennsylvania  
Martin J. London, M.D., San Francisco, California  
Edward Mascha, Ph.D., Cleveland, Ohio  
Peter Nagele, M.D., M.Sc., St. Louis, Missouri  
Piyush M. Patel, M.D., F.R.C.P.C., San Diego, California  
Paolo Pelosi, M.D., Ph.D., Varese, Italy  
Jean-Francois Pittet, M.D., Birmingham, Alabama  
James P. Rathmell, M.D., Boston, Massachusetts  
Alan Jay Schwartz, M.D., M.S.Ed., Philadelphia, Pennsylvania  
Jamie W. Sleight, M.D., Hamilton, New Zealand  
Jean-Louis Vincent, M.D., Ph.D., Brussels, Belgium  
Zhiyi Zuo, M.D., Ph.D., Charlottesville, Virginia

## EDITORIAL OFFICE

George H. Kendall (Winston-Salem), Managing Editor  
E-mail: [managing-editor@anesthesiology.org](mailto:managing-editor@anesthesiology.org)  
Vicky J. Farrington-Howrey (Iowa City)  
Angel R. Marsh (Iowa City)  
Shawn A. Platt (Iowa City)  
ANESTHESIOLOGY Journal  
Department of Anesthesia, 6546 JCP  
The University of Iowa  
200 Hawkins Drive  
Iowa City, IA 52242-1009  
Tel: (319) 356-4601; Fax (319) 353-6817  
E-mail: [editorial-office@anesthesiology.org](mailto:editorial-office@anesthesiology.org)

Access to articles published in ANESTHESIOLOGY is available to nonsubscribers through pay-per-view at the journal Web site, [www.anesthesiology.org](http://www.anesthesiology.org). Authors may order quantity print or electronic reprints of their own articles using the order form supplied with their proofs and posted to the journal Web site. For all other bulk purchases, please contact [reprintsolutions@wolterskluwer.com](mailto:reprintsolutions@wolterskluwer.com) in North America, Carlos Moreyra ([Carlos.Moreyra@wkglobal.com](mailto:Carlos.Moreyra@wkglobal.com)) in Latin America, and Jean Jones ([PS-Reprints@wolterskluwer.com](mailto:PS-Reprints@wolterskluwer.com)) in Europe and elsewhere.

The affiliations, areas of expertise, and conflict-of-interest disclosure statements for each Editor and Associate Editor can be found on the Journal's Web site ([www.anesthesiology.org](http://www.anesthesiology.org)).
